# Supplementary material for: PCDH15 dual-AAV gene therapy for deafness and blindness in Usher syndrome type 1F models
Source: JCI journal article supplement (doi:10.1172/jci177700), 2024-10-23
Supplement: sd2 [file 2]

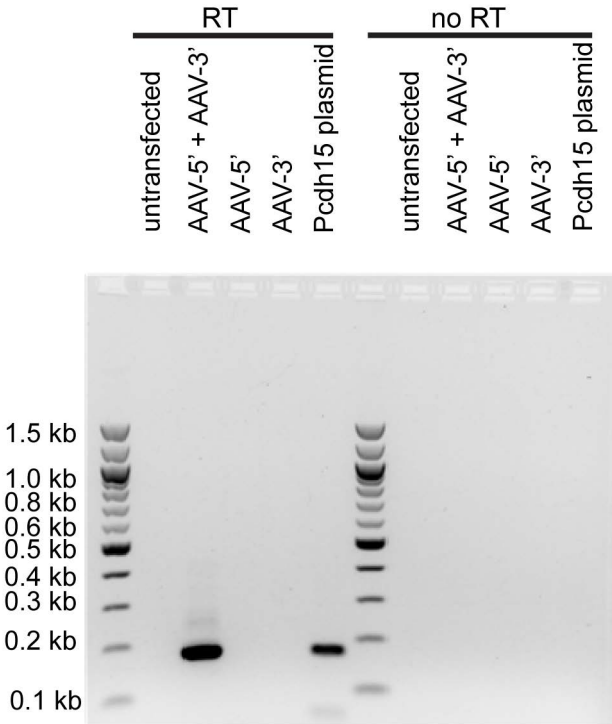

Full unedited gel for Figure 1B
